# Supplementary material for: Exploring the role of varied-length spacers in charge transfer: a theoretical investigation on pyrimidine-bridged porphyrin dyes
Source: Royal Society of Chemistry journal article supplement (doi:10.1039/c3ra40702k), 2013-01-01
Supplement: c3ra40702k.pdf [file c3ra40702k.pdf]

## Supplementary Information

# Explore the Role of Varied-Length Spacers in the Charge Transfer: a Theoretical Investigation on the Pyrimidine-Bridged Porphyrin Dyes

Meiyuan Guo<sup>a</sup>, Ming Li<sup>a, b</sup>, Yulan Dai<sup>a</sup>, Wei Shen<sup>a</sup>, Jingdong Peng<sup>a, \*</sup>, Chaoyuan Zhu<sup>c</sup>, Sheng Hsien Lin<sup>c</sup>, Rongxing He<sup>a, b, †</sup>

<sup>a</sup> School of Chemistry and Chemical Engineering, Southwest University, Chongqing 400715, China

<sup>b</sup> Education Ministry Key Laboratory on Luminescence and Real-Time Analysis, Southwest University, Chongqing 400715, China

<sup>c</sup> Department of Applied Chemistry, Institute of Molecular Science and Center for Interdisciplinary Molecular Science, National Chiao-Tung University, Hsinchu 300, Taiwan

---

\* E-mail: hxpengjd@swu.edu.cn

† To whom correspondence should be addressed. E-mail: herx@swu.edu.cn

## Contents

| Details                                                                                                                                                                                                                                                                                                                                                                                                                                                                                         | Page  |
|-------------------------------------------------------------------------------------------------------------------------------------------------------------------------------------------------------------------------------------------------------------------------------------------------------------------------------------------------------------------------------------------------------------------------------------------------------------------------------------------------|-------|
| Table S1. Calculated transition energies, oscillator strength ( $f$ ), and configurations of porphyrin sensitizers with TD-DFT method. $f > 0.10$ , and configurations which contribute more than 5% are shown.                                                                                                                                                                                                                                                                                 | 3-5   |
| Table S2. Electron density difference plots of electronic transition for each porphyrin. $\Delta D$ is the electron transfer distance ( $\text{\AA}$ ); $\Delta q$ is the fraction of electron exchange ( $ e^- $ ), $\Omega$ is overlaps between the regions of density depletion and increment. (Isovalue: $4 \times 10^{-4} e \cdot \text{au}^{-3}$ )                                                                                                                                        | 6-10  |
| Table S3. Molecular orbitals involved in electron transitions. (Isovalue: $4 \times 10^{-4} e \cdot \text{au}^{-3}$ )                                                                                                                                                                                                                                                                                                                                                                           | 11-14 |
| Table S4. Transition energies (in eV) of $Q$ band and $B$ band (two components) <sup>a</sup> for ZnBPP-1PE, ZnBPP-2PE and ZnBPP-3PE dyes in the tetrahydrofuran solution for the $S_0 \rightarrow S_1$ transition. Computed for the B3LYP/6-311g(d, p) optimized geometries.                                                                                                                                                                                                                    | 15    |
| Table S5. Electron density difference plots of electronic transition $S_0 \rightarrow S_1$ (TDDFT/WB97XD/6-311g(d, p)) for ZnBPP-1PE, ZnBPP-2PE and ZnBPP-3PE dyes. $\Delta D$ is the electron transfer distance ( $\text{\AA}$ ); $\Delta q$ is the fraction of electron exchange ( $ e^- $ ), $\Omega$ is overlaps between the regions of density depletion and increment. (Isovalue: $4 \times 10^{-4} e \cdot \text{au}^{-3}$ ). Computed for the WB97XD/6-311g(d, p) optimized geometries. | 16    |

Table S1. Calculated transition energies, oscillator strength ( $f$ ), and configurations of porphyrin sensitizers with TD-DFT method.  $f > 0.10$ , and configurations which contribute more than 5% are shown.

| Sensitizers | Wavelength (nm) | $f$    | Main Configurations (Assignment: H=HOMO, L=LUMO, L+1=LUMO+1, H-1=HOMO-1, etc.)              |
|-------------|-----------------|--------|---------------------------------------------------------------------------------------------|
| ZnBPP-1PM   | 662.5           | 1.0467 | H-0->L+0(+95%)                                                                              |
|             | 517.5           | 0.1840 | H-0->L+1(+65%) H-1->L+2(+31%)                                                               |
|             | 422.6           | 1.1850 | H-2->L+0(+38%) H-1->L+2(+36%)<br>H-0->L+1(17%)                                              |
|             | 407.2           | 1.3976 | H-1->L+1(+56%) H-0->L+2(+37%)                                                               |
|             | 389.0           | 0.1240 | H-2->L+0(+32%) H-4->L+0(19%)<br>H-6->L+0(+16%) H-1->L+2(12%)<br>H-0->L+1(+8%) H-10->L+0(7%) |
| ZnBPP-1PM2  | 715.4           | 1.0233 | H-0->L+0(+98%)                                                                              |
|             | 570.4           | 0.1139 | H-0->L+1(+77%) H-1->L+2(+20%)                                                               |
|             | 455.0           | 2.1026 | H-2->L+0(+60%) H-1->L+2(+28%)                                                               |
|             | 424.8           | 1.1397 | H-1->L+1(+55%) H-0->L+2(+40%)                                                               |
|             | 413.2           | 0.1699 | H-2->L+0(+36%) H-1->L+2(30%)<br>H-0->L+3(+17%) H-0->L+1(+13%)                               |
|             | 373.9           | 0.0996 | H-6->L+0(+82%) H-6->L+1(8%)                                                                 |
|             | 349.1           | 0.3626 | H-2->L+2(+36%) H-1->L+3(+34%)<br>H-4->L+1(9%) H-6->L+2(6%)                                  |
| ZnBPP-2PM2  | 702.7           | 1.0500 | H-0->L+0(+98%)                                                                              |
|             | 445.7           | 2.273  | H-1->L+2(+41%) H-2->L+0(+31%)<br>H-0->L+3(13%) H-0->L+1(10%)                                |
|             | 429.2           | 0.9189 | H-1->L+2(+41%) H-2->L+0(+31%)<br>H-0->L+3(13%) H-0->L+1(10%)                                |
|             | 381.2           | 0.1726 | H-6->L+0(+65%) H-0->L+3(+17%)<br>H-6->L+1(7%)                                               |
|             | 371.1           | 0.5267 | H-1->L+3(+86%) H-0->L+2(7%)                                                                 |
| ZnBPP-1PM3  | 723.8           | 0.6466 | H-0->L+0(+98%)                                                                              |
|             | 592.8           | 0.6138 | H-0->L+1(+82%) H-1->L+2(+15%)                                                               |
|             | 495.5           | 1.8347 | H-2->L+0(+85%) H-1->L+2(8%)                                                                 |
|             | 451.2           | 0.7397 | H-0->L+3(+42%) H-1->L+2(+31%)<br>H-2->L+0(+11%) H-0->L+1(9%)                                |
|             | 436.0           | 0.8872 | H-1->L+1(+54%) H-0->L+2(+38%)                                                               |
|             | 426.3           | 0.1182 | H-2->L+1(+45%) H-0->L+3(+38%)<br>H-1->L+2(11%)                                              |
|             | 390.6           | 0.1375 | H-3->L+0(+50%) H-4->L+0(+18%)<br>H-2->L+1(12%) H-1->L+2(8%)                                 |
|             | 379.4           | 0.3066 | H-2->L+1(+28%) H-3->L+0(+18%)<br>H-1->L+2(+17%) H-0->L+3(13%)<br>H-0->L+4(11%)              |
|             | 368.9           | 0.2836 | H-2->L+2(+28%) H-5->L+0(+26%)<br>H-6->L+0(18%) H-1->L+3(11%)<br>H-5->L+1(+6%)               |
|             | 366.3           | 0.3069 | H-5->L+0(+39%) H-2->L+2(39%)<br>H-6->L+0(8%) H-1->L+3(+7%)                                  |
|             | 360.7           | 0.1160 | H-7->L+0(+76%) H-7->L+1(+6%)<br>H-3->L+1(5%)                                                |
| ZnBPP-2PM3  | 756.8           | 0.6321 | H-0->L+0(+99%)                                                                              |
|             | 595.1           | 0.6313 | H-0->L+1(+83%) H-1->L+2(14%)                                                                |
|             | 486.7           | 1.6690 | H-0->L+3(+48%) H-1->L+2(23%)<br>H-2->L+0(20%)                                               |

|            |       |        |                                                                               |
|------------|-------|--------|-------------------------------------------------------------------------------|
|            | 465.9 | 0.4682 | H-2->L+0(+69%) H-0->L+3(+26%)                                                 |
|            | 448.2 | 0.4831 | H-1->L+1(+49%) H-0->L+2(28%)<br>H-1->L+3(21%)                                 |
|            | 420.2 | 0.5455 | H-1->L+2(+39%) H-2->L+1(+28%)<br>H-0->L+3(+18%) H-2->L+0(7%)<br>H-0->L+1(+6%) |
|            | 404.7 | 0.7462 | H-1->L+3(+72%) H-0->L+2(17%)<br>H-1->L+1(+5%)                                 |
|            | 389.6 | 0.4269 | H-5->L+0(+81%) H-7->L+0(+5%)                                                  |
|            | 366.8 | 0.2288 | H-7->L+0(+52%) H-8->L+0(+13%)<br>H-2->L+1(+10%)                               |
| ZnBPP-3PM3 | 717.3 | 0.7406 | H-0->L+0(+98%)                                                                |
|            | 592.0 | 0.5129 | H-0->L+1(+83%) H-1->L+2(+13%)                                                 |
|            | 483.0 | 1.2466 | H-0->L+3(+56%) H-1->L+2(+28%)<br>H-0->L+1(7%) H-2->L+0(5%)                    |
|            | 461.8 | 0.2691 | H-1->L+1(33%) H-1->L+3(+33%)<br>H-0->L+2(32%)                                 |
|            | 444.2 | 1.4889 | H-2->L+0(+77%) H-0->L+3(+14%)                                                 |
|            | 408.7 | 0.2158 | H-1->L+2(+40%) H-0->L+3(21%)<br>H-2->L+1(15%) H-2->L+0(+11%)<br>H-0->L+1(5%)  |
|            | 402.8 | 1.0806 | H-1->L+3(+63%) H-0->L+2(+28%)<br>H-1->L+1(+6%)                                |
|            | 387.3 | 0.2800 | H-6->L+0(+77%) H-6->L+1(+7%)<br>H-5->L+0(+7%)                                 |
| ZnBPP-1PE  | 591.2 | 0.3820 | H-0->L+0(+81%) H-1->L+1(19%)                                                  |
|            | 436.6 | 1.6593 | H-1->L+1(+59%) H-0->L+2(+21%)<br>H-0->L+0(+15%)                               |
|            | 432.5 | 1.1525 | H-1->L+0(+53%) H-0->L+1(42%)                                                  |
|            | 360.7 | 0.2107 | H-5->L+0(+56%) H-1->L+2(+30%)                                                 |
|            | 341.8 | 0.2300 | H-2->L+1(+68%) H-4->L+0(+16%)                                                 |
| ZnBPP-2PE  | 604.9 | 0.7785 | H-0->L+0(+85%) H-1->L+1(+14%)                                                 |
|            | 472.0 | 1.3615 | H-0->L+2(+58%) H-1->L+1(+31%)<br>H-0->L+0(7%)                                 |
|            | 443.9 | 0.7879 | H-1->L+0(+54%) H-0->L+1(+35%)<br>H-1->L+2(9%)                                 |
|            | 432.2 | 0.6455 | H-2->L+0(+46%) H-0->L+2(+29%)<br>H-1->L+1(21%)                                |
|            | 396.6 | 0.3003 | H-1->L+2(+80%) H-2->L+1(+11%)<br>H-0->L+1(+6%)                                |
|            | 368.1 | 0.5164 | H-2->L+1(+72%) H-1->L+2(8%)<br>H-4->L+0(+8%)                                  |
|            | 345.3 | 0.1589 | H-0->L+3(+70%) H-2->L+2(18%)                                                  |
|            | 336.7 | 0.2267 | H-2->L+2(+60%) H-6->L+1(+12%)<br>H-4->L+1(+10%) H-0->L+3(+6%)<br>H-8->L+0(6%) |
|            | 333.7 | 0.1728 | H-6->L+1(+31%) H-4->L+1(+22%)<br>H-2->L+2(17%) H-0->L+3(10%)<br>H-9->L+0(6%)  |
| ZnBPP-3PE  | 609.4 | 1.0569 | H-0->L+0(+86%) H-1->L+1(12%)                                                  |
|            | 494.6 | 1.1262 | H-0->L+2(+72%) H-1->L+1(+19%)                                                 |
|            | 453.9 | 1.1268 | H-2->L+0(+57%) H-1->L+1(+21%)<br>H-0->L+2(17%)                                |
|            | 449.0 | 0.5952 | H-1->L+0(+54%) H-0->L+1(30%)<br>H-1->L+2(+13%)                                |
|            | 414.4 | 0.3005 | H-1->L+2(+74%) H-2->L+1(+13%)                                                 |

|  |       |        |                                                                              |
|--|-------|--------|------------------------------------------------------------------------------|
|  |       |        | H-0->L+1(+9%)                                                                |
|  | 405.2 | 0.1285 | H-2->L+0(+33%) H-1->L+1(31%)<br>H-0->L+3(20%) H-0->L+2(+9%)                  |
|  | 385.0 | 0.7559 | H-2->L+2(+71%) H-0->L+3(+21%)                                                |
|  | 384.1 | 0.5714 | H-2->L+1(+78%) H-1->L+2(10%)<br>H-1->L+0(+5%)                                |
|  | 371.2 | 0.1287 | H-0->L+3(+41%) H-2->L+2(23%)<br>H-3->L+0(+21%) H-1->L+1(5%)<br>H-2->L+0(+5%) |
|  | 341.7 | 0.1161 | H-1->L+3(+87%)                                                               |

Table S2. Electron density difference plots of electronic transition  $S_0 \rightarrow S_1$  for each porphyrin.  $\Delta D$  is the electron transfer distance ( $\text{\AA}$ )<sup>a</sup>;  $\Delta q$  is the fraction of electron exchange ( $e^-$ )<sup>b</sup>,  $\Omega$  is overlaps between the regions of density depletion and increment. (Isovalue:  $4 \times 10^{-4} e \cdot \text{au}^{-3}$ )

| ZnBPP-1PE                                                                                                                                                     | ZnBPP-1PM                                                                                                                                                  | ZnBPP-1PM2                                                                                                                                                  |
|---------------------------------------------------------------------------------------------------------------------------------------------------------------|------------------------------------------------------------------------------------------------------------------------------------------------------------|-------------------------------------------------------------------------------------------------------------------------------------------------------------|
| E=591.2nm, $\Delta D= 2.141$<br>$\Delta q=0.656$ , $\Omega=0.383$<br>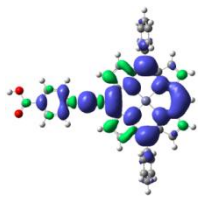        | E=662.5nm, $\Delta D=8.038$ , $\Delta q=1.049$ , $\Omega= 0.243$<br>      | E=715.4nm, $\Delta D=15.076$ , $\Delta q=1.3091$ , $\Omega= 0.0146$<br>   |
| E=436.6nm, $\Delta D= 7.417$<br>$\Delta q=0.6237$ , $\Omega=0.1353$<br>      | E=517.5nm, $\Delta D= 9.118$ , $\Delta q=0.6548$ , $\Omega= 0.0907$<br>   | E=570.4nm, $\Delta D=6.944$ , $\Delta q=0.6533$ , $\Omega= 0.2890$<br>    |
| E=432.5nm, $\Delta D= 6.478$<br>$\Delta q= 0.5194$ , $\Omega= 0.0752$<br>  | E=422.6nm, $\Delta D= 8.554$ , $\Delta q=0.6537$ , $\Omega= 0.1167$<br> | E=455.0nm, $\Delta D=11.060$ , $\Delta q=0.8423$ , $\Omega= 0.2685$<br> |
| E=360.7nm, $\Delta D= 4.608$<br>$\Delta q= 0.9235$ , $\Omega= 0.3488$<br>  | E=407.2nm, $\Delta D= 10.837$ , $\Delta q=0.6130$ , $\Omega= 0.007$<br> | E=424.8nm, $\Delta D=14.217$ , $\Delta q=0.5438$ , $\Omega= 0.0340$<br> |
| E=341.8nm, $\Delta D= -3.194$<br>$\Delta q= 0.7366$ , $\Omega= 0.4245$<br> | E=389.0nm, $\Delta D= 9.992$ , $\Delta q=0.8319$ , $\Omega= 0.0408$<br> | E=413.2nm, $\Delta D=13.995$ , $\Delta q=0.7828$ , $\Omega= 0.0339$<br> |
| ZnBPP-2PE                                                                                                                                                     | ZnBPP-2PM2                                                                                                                                                 | E=373.9nm, $\Delta D=15.530$ , $\Delta q=1.1052$ , $\Omega= 0.0283$                                                                                         |
| E=604.9nm, $\Delta D= 2.924$ , $\Delta q=0.7046$ , $\Omega= 0.4381$                                                                                           | E=702.7nm, $\Delta D= 14.632$ , $\Delta q=1.3209$ , $\Omega= 0.0236$                                                                                       |                                                                                                                                                             |

|                                                                                     |                                                                                     |                                                                                      |
|-------------------------------------------------------------------------------------|-------------------------------------------------------------------------------------|--------------------------------------------------------------------------------------|
| 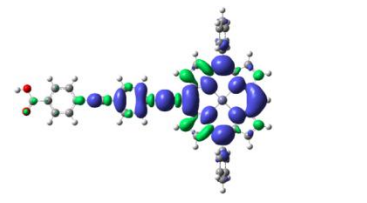   |    |    |
| E=472.0nm, $\Delta D= 13.730$ , $\Delta q= 0.86279$ , $\Omega= 0.0129$              | E=445.7nm, $\Delta D= 13.4888$ , $\Delta q= 0.7098$ , $\Omega= 0.0744$              | E=349.1nm, $\Delta D=6.737$ , $\Delta q=0.6592$ , $\Omega= 0.3811$                   |
|    |    |    |
| E=443.9nm, $\Delta D= 12.175$ , $\Delta q= 0.6217$ , $\Omega= 0.0334$               | E=429.2nm, $\Delta D= 13.845$ , $\Delta q= 0.6298$ , $\Omega= 0.0378$               | ZnBPP-1PM3<br>E=723.8nm, $\Delta D=21.219$ , $\Delta q=1.4155$ , $\Omega= 0.0010$    |
|   |   |   |
| E=432.2nm, $\Delta D= 6.706$ , $\Delta q= 0.6050$ , $\Omega= 0.2806$                | E=381.2nm, $\Delta D=14.795$ , $\Delta q=0.9860$ , $\Omega= 0.0278$                 | E=592.8nm, $\Delta D=3.929$ , $\Delta q=0.6769$ , $\Omega= 0.3853$                   |
|  |  |  |
| E=396.6nm, $\Delta D= 14.170$ , $\Delta q= 1.0130$ , $\Omega= 0.0215$               | E=371.1nm, $\Delta D= 11.957$ , $\Delta q= 1.1080$ , $\Omega= 0.0922$               | E=495.5nm, $\Delta D=14.902$ , $\Delta q=1.0896$ , $\Omega= 0.1080$                  |
|  |  |  |
| E=368.1nm, $\Delta D= -8.076$ , $\Delta q= 0.7939$ , $\Omega= 0.2621$               | ZnBPP-3PM3<br>E=717.3nm, $\Delta D=20.343$ , $\Delta q=1.3825$ , $\Omega= 0.0031$   | E=451.2nm, $\Delta D=18.641$ , $\Delta q=0.7677$ , $\Omega= 0.0181$                  |
|  |  |  |
| E=345.3nm, $\Delta D= 6.073$ , $\Delta q=$                                          | E=592.0nm, $\Delta D=12.478$ , $\Delta$                                             | E=436.0nm, $\Delta D=12.749$ , $\Delta$                                              |



|                                                                                                                                                                           |                                                                                                                                                             |                                                                                                                                                               |
|---------------------------------------------------------------------------------------------------------------------------------------------------------------------------|-------------------------------------------------------------------------------------------------------------------------------------------------------------|---------------------------------------------------------------------------------------------------------------------------------------------------------------|
| 0.8065, $\Omega= 0.5066$<br>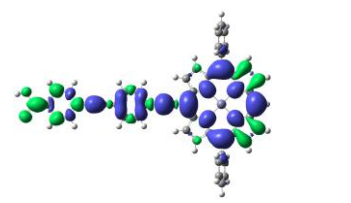                                                             | $q=0.7803, \Omega= 0.2062$<br>                                             | $q=0.5148, \Omega= 0.0808$<br>                                              |
| $E=336.7\text{nm}, \Delta D= 7.813, \Delta q= 0.7154, \Omega= 0.3245$<br>                | $E=483.0\text{nm}, \Delta D=17.042, \Delta q=0.8245, \Omega= 0.0282$<br>   | $E=426.3\text{nm}, \Delta D=8.143, \Delta q=0.6445, \Omega= 0.3410$<br>     |
| $E=333.7\text{nm}, \Delta D= 2.971, \Delta q= 0.6771, \Omega= 0.4316$<br>               | $E=461.8\text{nm}, \Delta D=16.723, \Delta q=0.7977, \Omega= 0.0300$<br>  | $E=390.6\text{nm}, \Delta D=21.608, \Delta q=0.9967, \Omega= 0.0043$<br>   |
| ZnBPP-3PE<br>$E=609.4\text{nm}, \Delta D= 3.818, \Delta q= 0.7222, \Omega= 0.4439$<br> | $E=444.2\text{nm}, \Delta D=15.478, \Delta q=0.9654, \Omega= 0.1162$<br> | $E=379.4\text{nm}, \Delta D=18.821, \Delta q=0.7222, \Omega= 0.0266$<br>  |
| $E=494.6\text{nm}, \Delta D= 18.314, \Delta q= 0.9636, \Omega= 0.0059$<br>             | $E=408.7\text{nm}, \Delta D=16.815, \Delta q=0.6207, \Omega= 0.0870$<br> | $E=368.9\text{nm}, \Delta D=18.895, \Delta q=0.8763, \Omega= 0.0968$<br>  |
| $E=453.9\text{nm}, \Delta D= -1.530, \Delta q= 0.5939, \Omega= 0.3367$<br>             | $E=402.8\text{nm}, \Delta D=17.028, \Delta q=0.8908, \Omega= 0.0185$<br> | $E=366.3\text{nm}, \Delta D=16.301, \Delta q=0.9189, \Omega= 0.2733$<br>  |
| $E=449.0\text{nm}, \Delta D= 15.914, \Delta q= 0.6716, \Omega= 0.0356$<br>             | $E=387.3\text{nm}, \Delta D=20.264, \Delta q=1.0804, \Omega= 0.0148$<br> | $E=360.7\text{nm}, \Delta D=21.100, \Delta q=1.04559, \Omega= 0.0215$<br> |



|                                                                                     |                                                                                   |                                                                                      |
|-------------------------------------------------------------------------------------|-----------------------------------------------------------------------------------|--------------------------------------------------------------------------------------|
| 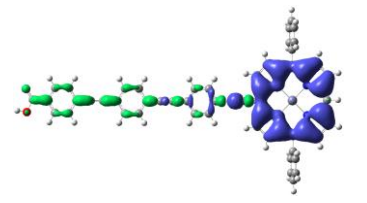   |  |    |
| E=414.4nm, $\Delta D= 19.153$ , $\Delta$<br>q= 0.9432, $\Omega= 0.0104$             |                                                                                   | ZnBPP-2PM3<br>E=756.8nm, $\Delta D=20.749$ , $\Delta$<br>q=1.4103, $\Omega= 0.0017$  |
|    |                                                                                   |    |
| E=405.2nm, $\Delta D= 10.921$ , $\Delta$<br>q= 0.6901, $\Omega= 0.4106$             |                                                                                   | E=595.1nm, $\Delta D=10.041$ , $\Delta$<br>q=0.7353, $\Omega= 0.2756$                |
|   |                                                                                   |   |
| E=385.0nm, $\Delta D= 10.357$ , $\Delta$<br>q= 0.7933, $\Omega= 0.3953$             |                                                                                   | E=486.7nm, $\Delta D=18.433$ , $\Delta$<br>q=0.8394, $\Omega= 0.0176$                |
|  |                                                                                   |  |
| E=384.1nm, $\Delta D= -12.626$ , $\Delta$<br>q= 0.8879, $\Omega= 0.1454$            |                                                                                   | E=465.9nm, $\Delta D=17.117$ , $\Delta$<br>q=1.0900, $\Omega= 0.0617$                |
|  |                                                                                   |  |
| E=371.2nm, $\Delta D= 11.545$ , $\Delta$<br>q= 0.7035, $\Omega= 0.3105$             |                                                                                   | E=448.2nm, $\Delta D=16.667$ , $\Delta$<br>q=0.7535, $\Omega= 0.0304$                |
|  |                                                                                   |  |
| E=341.7nm, $\Delta D= 15.188$ , $\Delta$<br>q= 1.1988, $\Omega= 0.1183$             |                                                                                   | E=420.2nm, $\Delta D=15.763$ , $\Delta$<br>q=0.6412, $\Omega= 0.1108$                |

|                                                                                   |  |                                                                                                                                                                                               |
|-----------------------------------------------------------------------------------|--|-----------------------------------------------------------------------------------------------------------------------------------------------------------------------------------------------|
| 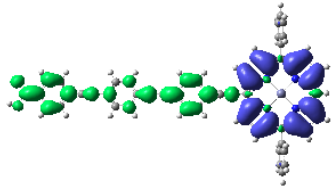 |  |                                                                                                             |
|                                                                                   |  | <p>E=404.7nm, <math>\Delta D=17.402</math>, <math>\Delta q=0.9820</math>, <math>\Omega=0.0142</math></p>    |
|                                                                                   |  | <p>E=389.6nm, <math>\Delta D=20.808</math>, <math>\Delta q=1.0143</math>, <math>\Omega=0.0123</math></p>    |
|                                                                                   |  | <p>E=366.8nm, <math>\Delta D=20.846</math>, <math>\Delta q=0.8555</math>, <math>\Omega=0.0080</math></p>  |

<sup>a</sup>calculated with Eq(10). <sup>c</sup>calculated with Eq(11)

Table S3. Molecular orbitals involved in electron transitions. (Isovalue:  $4 \times 10^{-4} e \cdot \text{au}^{-3}$ )

| Molecules | HOMOs                                                                                         | LUMOs                                                                                          |
|-----------|-----------------------------------------------------------------------------------------------|------------------------------------------------------------------------------------------------|
| ZnBPP-1PE | 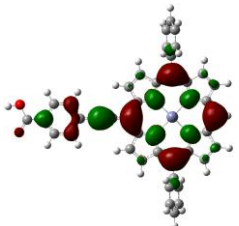<br>HOMO     | <br>LUMO     |
|           | <br>HOMO-1   | <br>LUMO+1   |
| ZnBPP-2PE | <br>HOMO    | <br>LUMO    |
|           | <br>HOMO-1 | <br>LUMO+1 |
| ZnBPP-3PE | <br>HOMO   | <br>LUMO   |

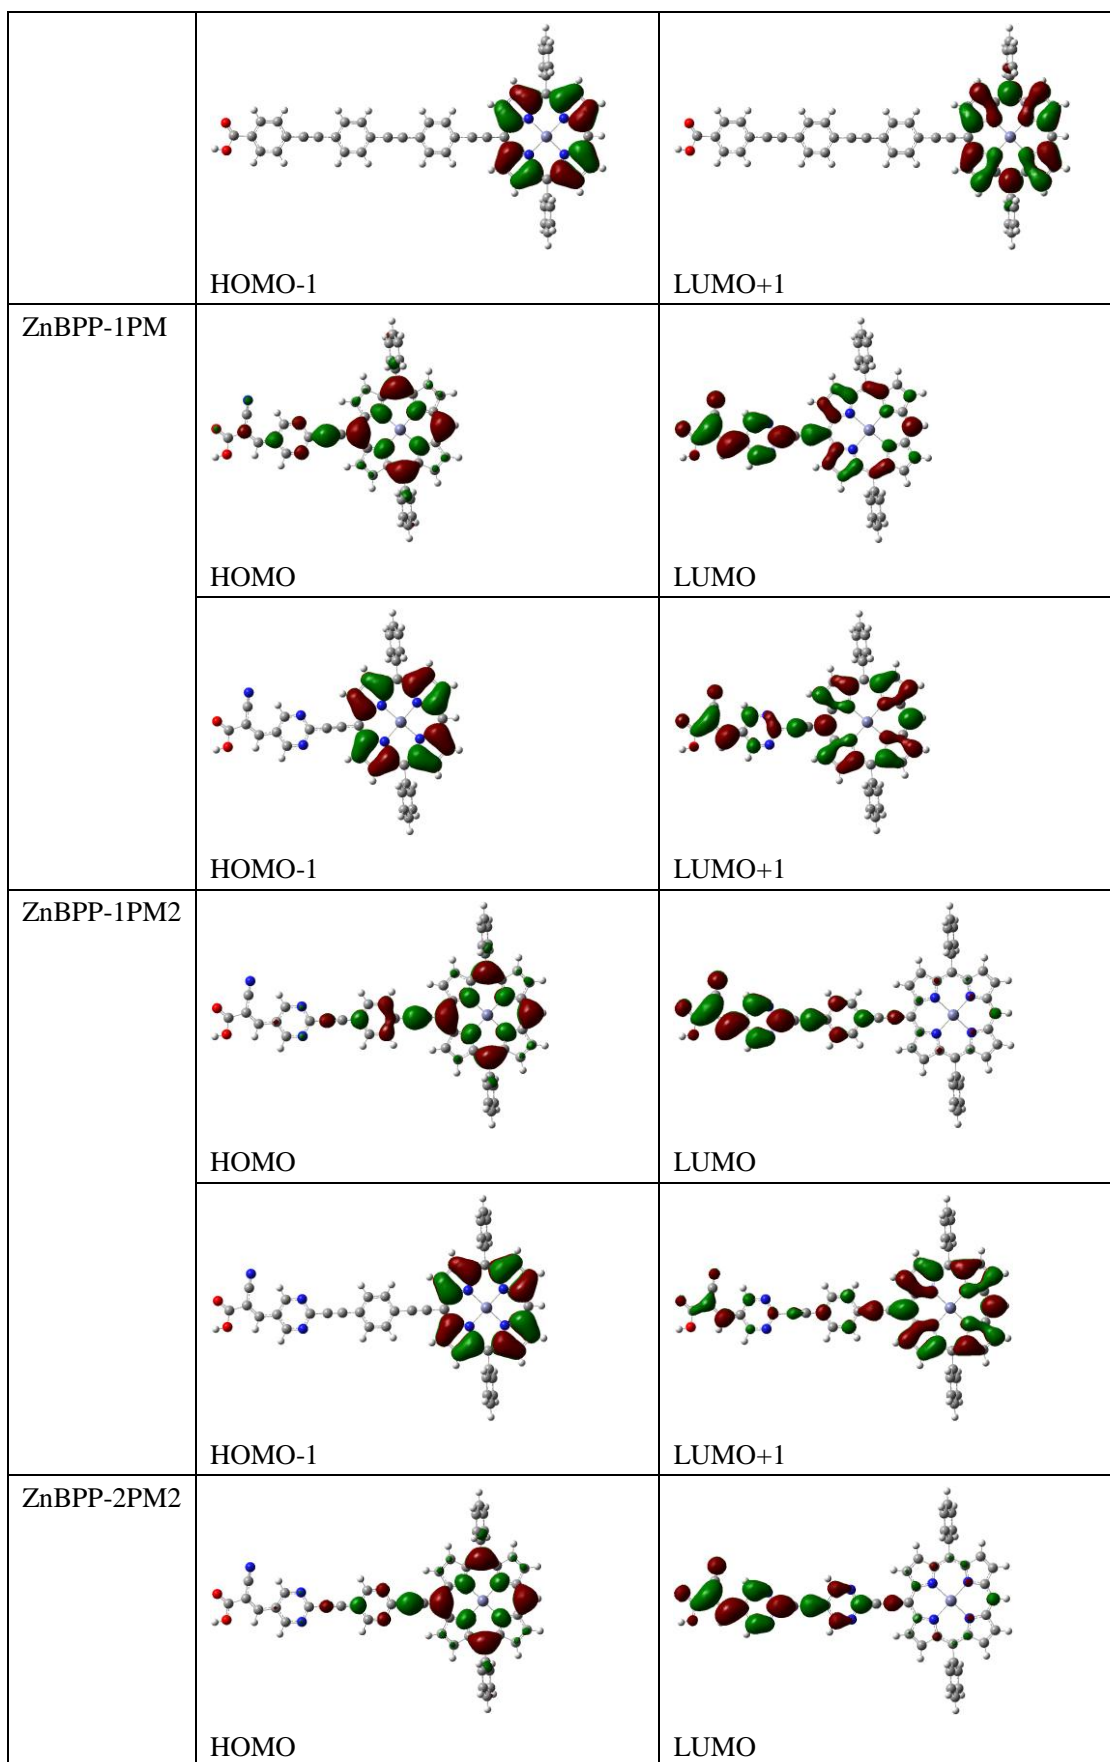

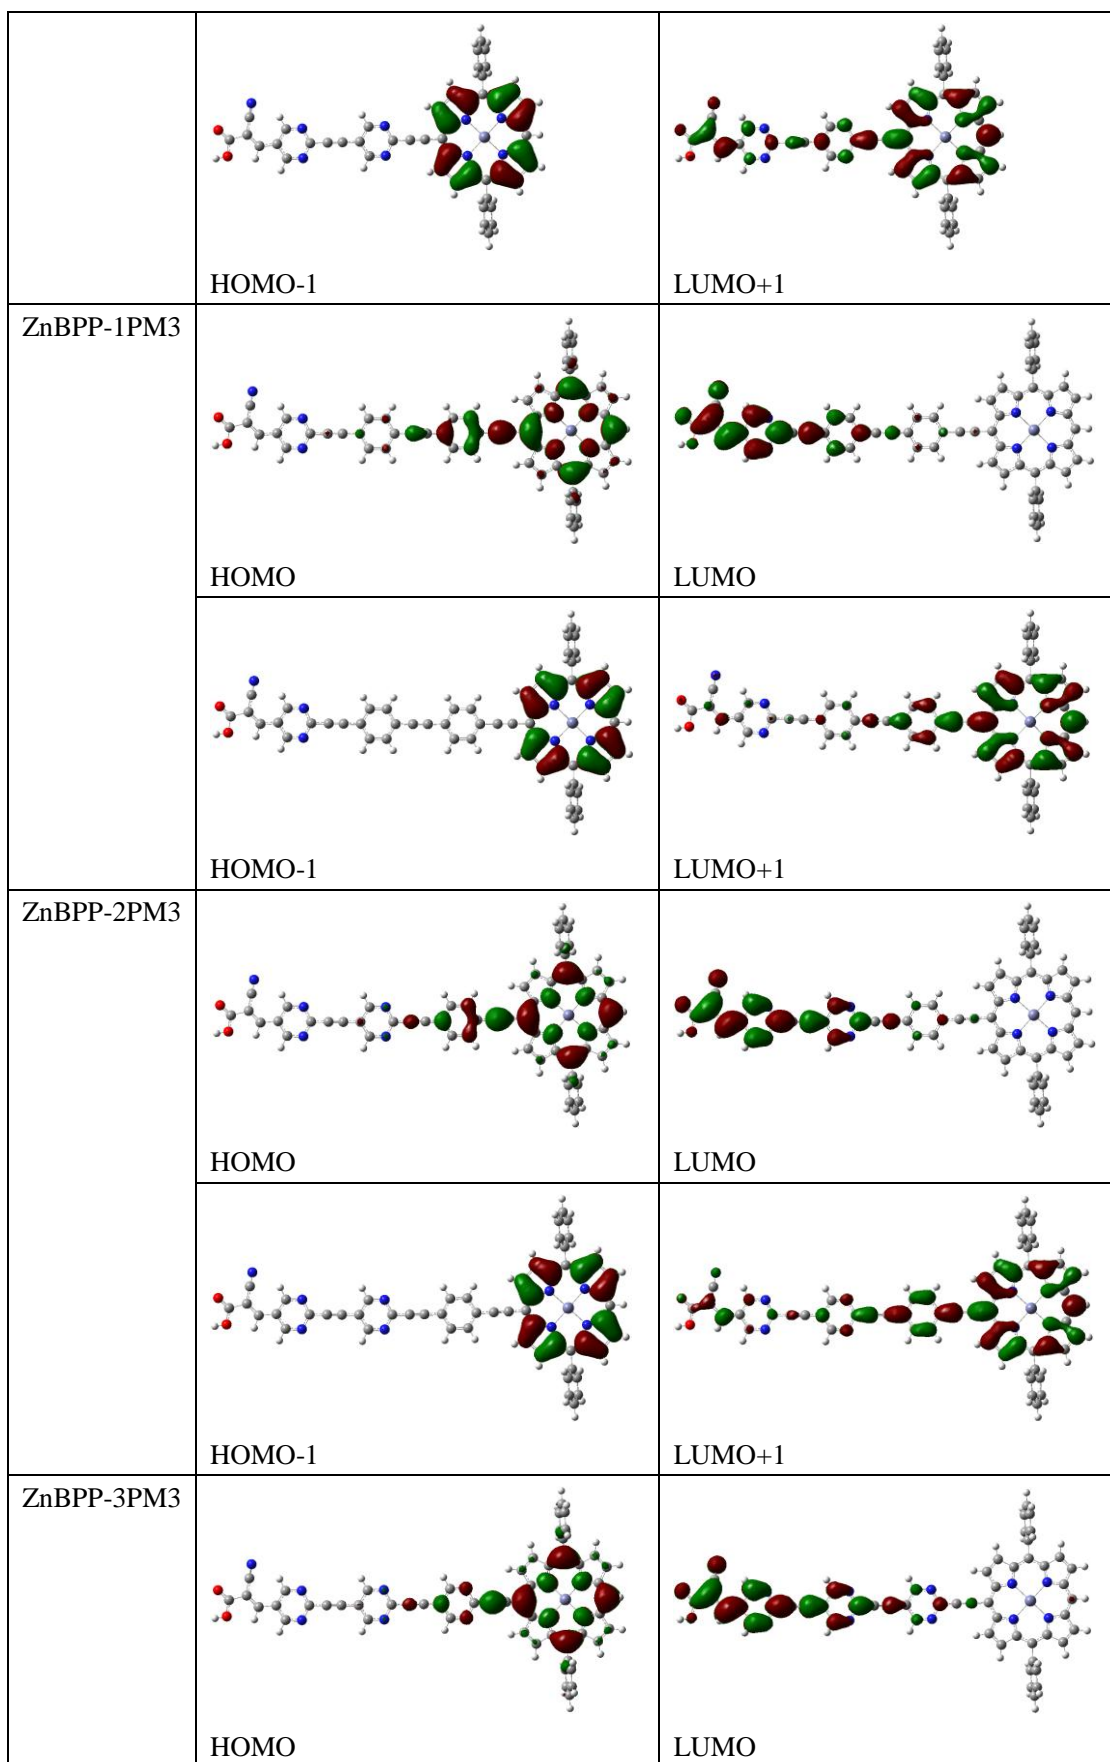

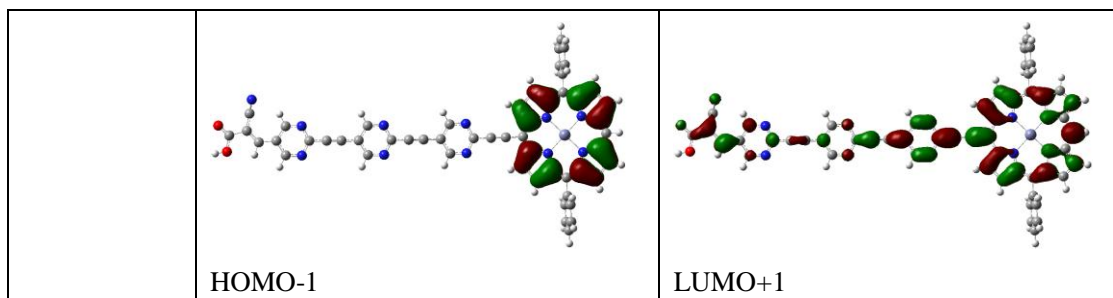

Table S4. Transition energies (in eV) of *Q* band and *B* band (two components)<sup>a</sup> for ZnBPP-PE1, ZnBPP-PE2 and ZnBPP-PE3 dyes in the tetrahydrofuran solution for the S<sub>0</sub>-S<sub>1</sub> transition. Computed for the B3LYP/6-311g(d, p) optimized geometries.

| Method                    | ZnBPP-PE1                  | ZnBPP-PE2                  | ZnBPP-PE3                  |
|---------------------------|----------------------------|----------------------------|----------------------------|
| B3LYP                     | 2.1152<br>(2.8628, 2.8912) | 2.0652<br>(2.6532, 2.8131) | 2.0505<br>(2.7517, 2.7810) |
| PBE0                      | 2.1597<br>(2.9344, 2.9698) | 2.1162<br>(2.7654, 2.9145) | 2.1049<br>(2.6721, 2.8969) |
| CAM-B3LYP                 | 2.1257<br>(3.0779, 3.1487) | 2.1076<br>(3.0052, 3.1361) | 2.1057<br>(2.9785, 3.1349) |
| LC-WPBE                   | 1.9487<br>(3.2021, 3.2856) | 1.9329<br>(3.1602, 3.2775) | 1.9316<br>(3.1495, 3.2770) |
| M062X                     | 2.1925<br>(3.0858, 3.1449) | 2.1715<br>(3.0093, 3.1297) | 2.1691<br>(2.9803, 3.1281) |
| WB97XD                    | 2.0814<br>(3.1044, 3.1718) | 2.0662<br>(3.0468, 3.1635) | 2.0649<br>(3.0272, 3.1630) |
| WB97XD <sup>b</sup>       | 2.1319<br>(3.1530, 3.2148) | 2.1190<br>(3.1076, 3.2085) | 2.1177<br>(3.0947, 3.2080) |
| Experimental <sup>c</sup> | 2.0127<br>(2.8242)         | 2.0062<br>(2.7987)         | 2.0029<br>(2.7987)         |

<sup>a</sup>There are two absorption components in *B* region for these sensitizers individually, these two components located so close that only one wide *B* absorption band could be observed.

<sup>b</sup>Transition energies (in eV) are computed for the WB97XD/6-311g(d, p) optimized geometries.

<sup>c</sup>Experimental value from Ref.6



Table S5. Electron density difference plots of electronic transition  $S_0 \rightarrow S_1$  (TDDFT/WB97XD/6-311g(d, p)) for ZnBPP-PE1, ZnBPP-PE2 and ZnBPP-PE3 dyes.  $\Delta D$  is the electron transfer distance ( $\text{\AA}$ );  $\Delta q$  is the fraction of electron exchange ( $e^-$ ),  $\Omega$  is overlaps between the regions of density depletion and increment. (Isovalue:  $4 \times 10^{-4} e \cdot \text{au}^{-3}$ ). Computed for the WB97XD/6-311g(d, p) optimized geometries.

| ZnBPP-PE1                                                                         | ZnBPP-PE2                                                                         | ZnBPP-PE3                                                                          |
|-----------------------------------------------------------------------------------|-----------------------------------------------------------------------------------|------------------------------------------------------------------------------------|
| $\Delta D = 2.511$ , $\Delta q = 0.5655$ , $\Omega = 0.2352$                      | $\Delta D = 3.180$ , $\Delta q = 0.5580$ , $\Omega = 0.2306$                      | $\Delta D = 3.394$ , $\Delta q = 0.5511$ , $\Omega = 0.2257$                       |
|  |  |  |
